# Supplementary material for: Ultra wide-field lens-free monitoring of cells on-chip
Source: Royal Society of Chemistry journal article supplement (doi:10.1039/b713695a), 2007-11-01
Supplement: b713695a.pdf [file b713695a.pdf]

## Supplementary Figures:

### S.1

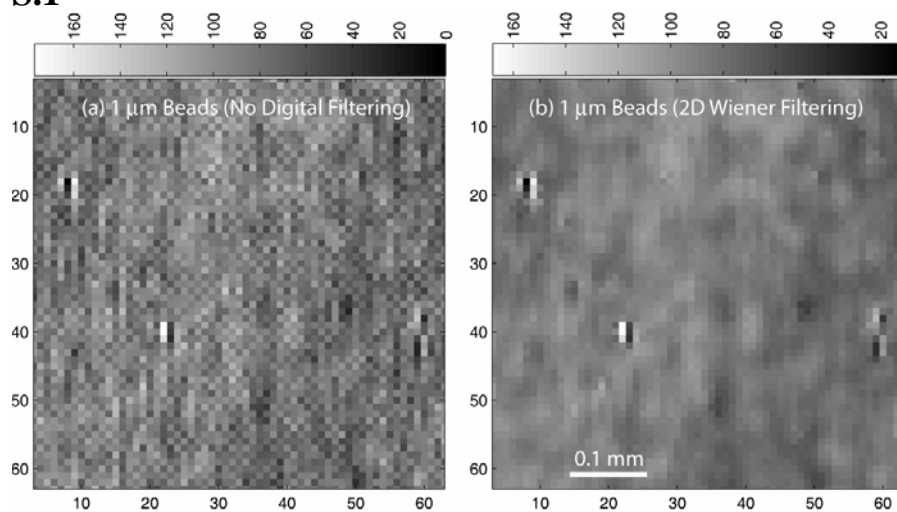

Figure S.1: (a) LUCAS image of 1 μm diameter polystyrene microbeads. (b) 2D Wiener filtering applied to the same image to digitally increase the contrast and SNR of the image.

## Supplementary Figures (Cont'd):

### S.2

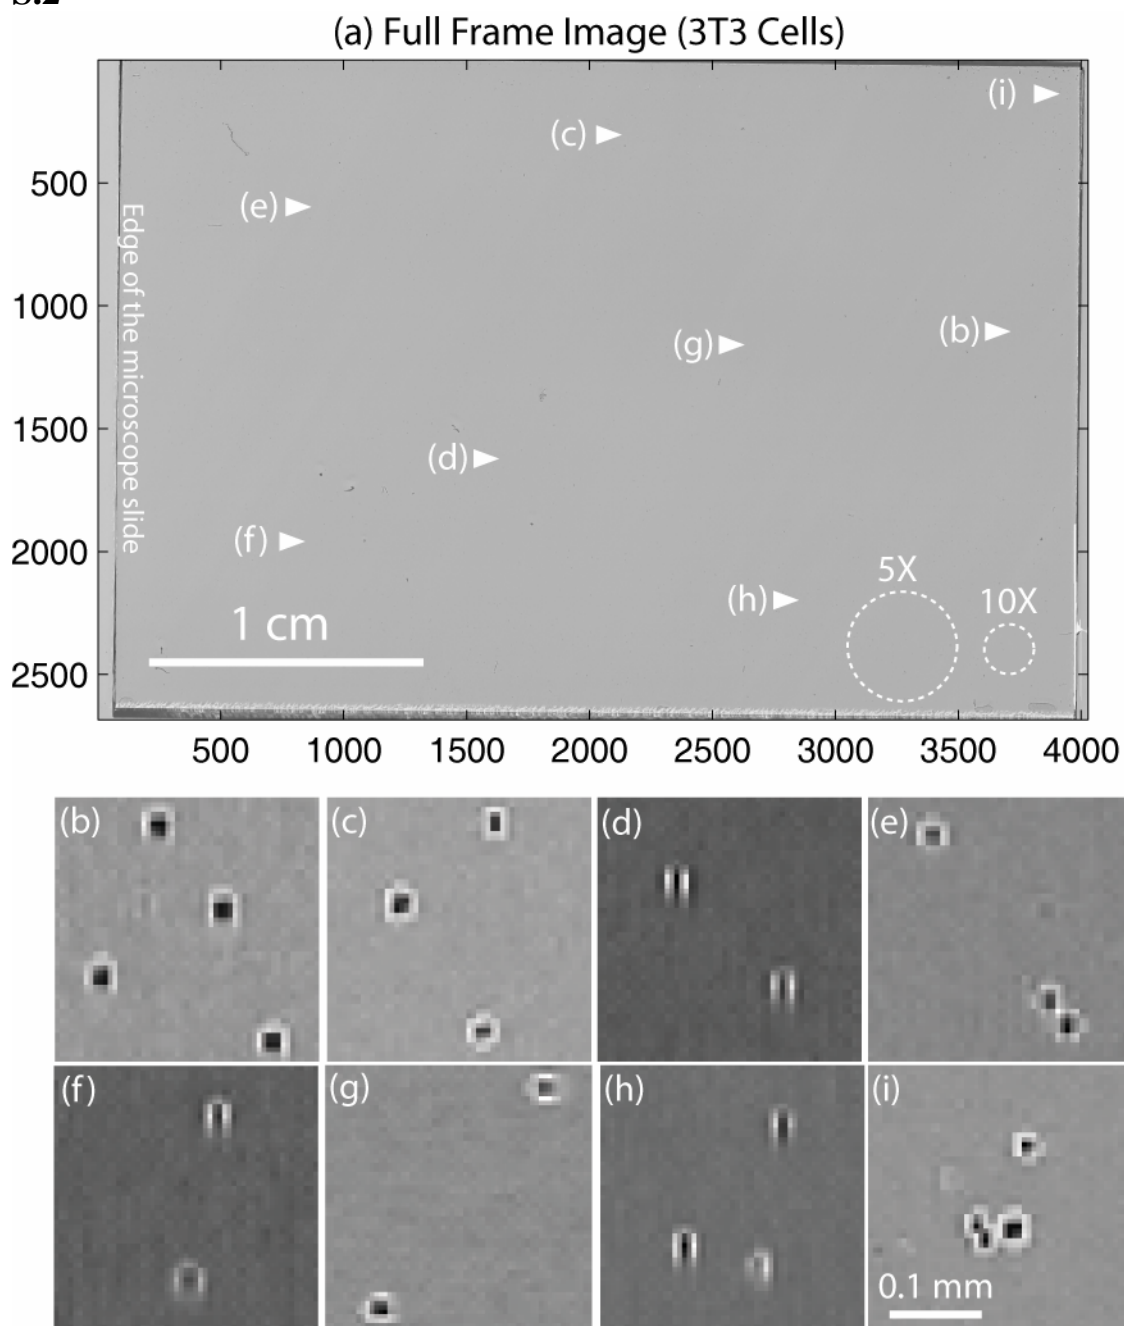

Figure S.2: Same as Fig. 6, except for NIH-3T3 fibroblasts.

**Supplementary Figures (Cont'd):  
S.3**

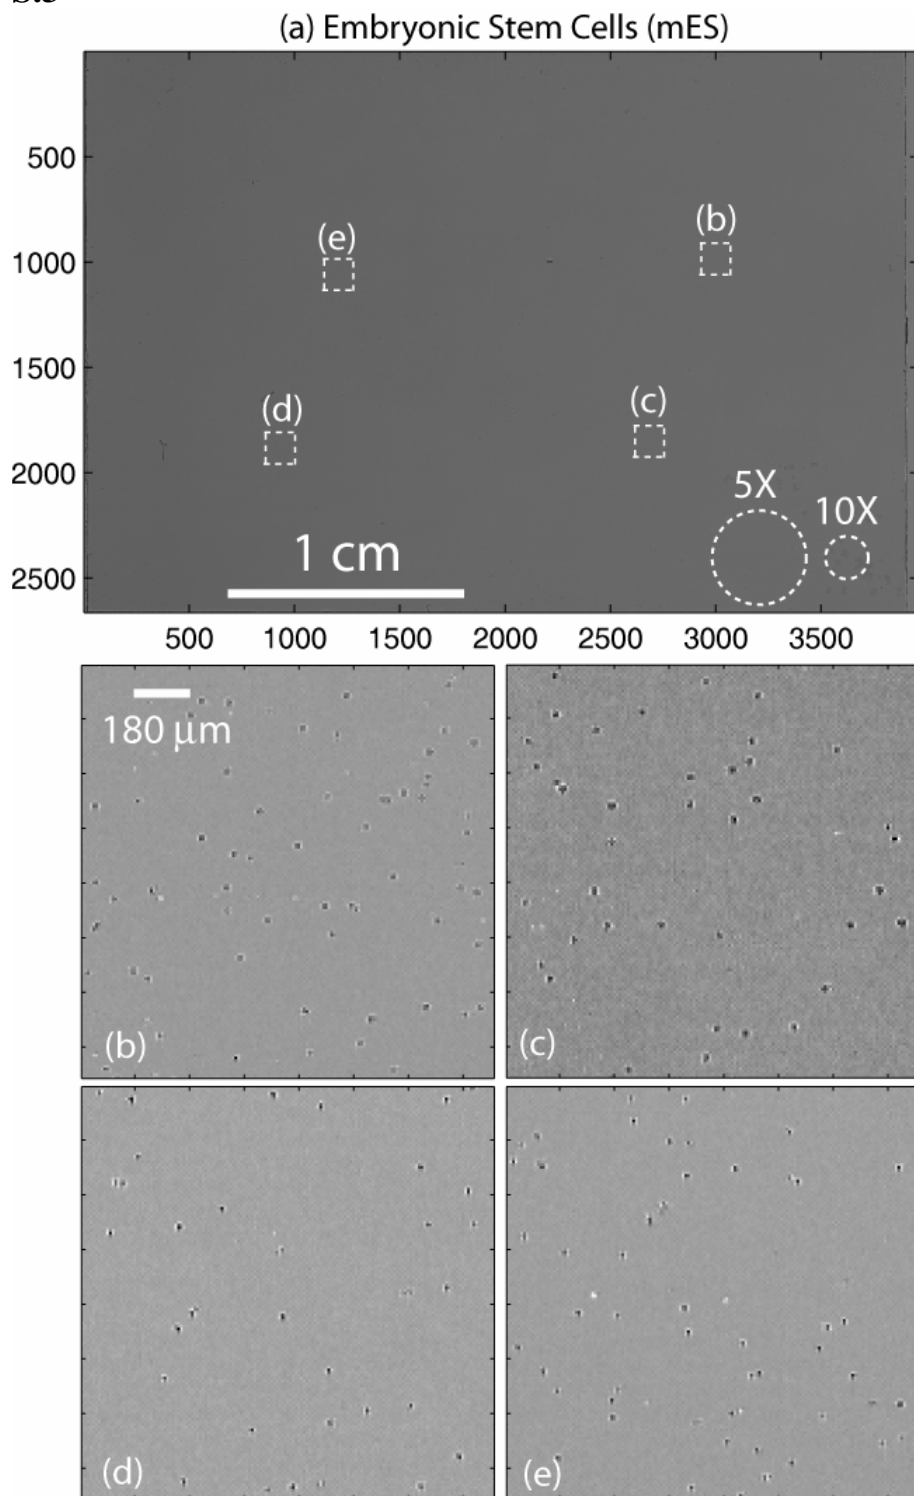

Figure S.3: Same as Fig. 6, except for mESC cells.
